# Supplementary material for: Mechanochemical solid-state transformations from a 3D lead(ii) chloride triazole carboxylate coordination polymer to its bromide/thiocyanate analogs via anion-replacements: precursors for the preparation of lead(ii) chloride/bromide/sulfide nanoparticles
Source: Royal Society of Chemistry journal article supplement (doi:10.1039/c2ce25277e), 2012-01-01
Supplement: c2ce25277e.pdf [file c2ce25277e.pdf]

## **Electronic Supplementary Information for MS:**

**Mechanochemical solid-state transformations from a 3D  
lead(II) chloride triazole carboxylate coordination polymer to  
its bromide/thiocyanate analogs via anion-replacements;  
precursors for the preparation of lead(II)  
chloride/bromide/sulfide nanoparticles**

**Vahid Safarifard and Ali Morsali\***

Department of Chemistry, Faculty of Sciences, Tarbiat Modares University, P.O. Box  
14115-175, Tehran, Islamic Republic of Iran

## ‡ Experimental section:

### *Synthesis of coordination polymers 1, 2 and 3:*

Crystals of **1** were prepared by a branched tube method,<sup>20</sup> 1H-1,2,4-triazole-3-carboxylic acid (0.117 g, 1 mmol), potassium chloride (0.074 g, 1 mmol) and lead(II) nitrate (0.331 g, 1 mmol) were placed in the arm to be heated. Water was carefully added to fill both arms, and then the arm to be heated was placed in a bath at 60 °C. After 3 days, colorless crystals were deposited in the cooler arm which were filtered off, washed with water and air dried. (0.21 g, yield 57%), m.p. >300 °C. (Found C, 9.88; H, 1.12; N, 11.47. calculated for C<sub>3</sub>H<sub>4</sub>ClN<sub>3</sub>O<sub>3</sub>Pb; C: 9.67, H: 1.08, N: 11.27%). IR (cm<sup>-1</sup>) selected bands: 560(s), 663(s), 1094(s), 1302(m), 1468(m), 1595(vs), and 3407(br). The 3D [Pb(L)(μ<sub>2</sub>-Cl)(H<sub>2</sub>O)]<sub>n</sub> (**1**) polymerizes on grinding the solid with KBr and KSCN for 20 min in an agate mortar and pestle to form 3D coordination polymers, [Pb(L)(μ<sub>2</sub>-Br)(H<sub>2</sub>O)]<sub>n</sub> (**2**)<sup>19a</sup> and [Pb(L)(μ<sub>1,1</sub>-NCS)(H<sub>2</sub>O)]<sub>n</sub> (**3**),<sup>21</sup> respectively. These powder samples separated by washing. In the case of **2**, yield: 70% (m.p > 300 °C). Found C, 8.55; H, 0.99; N, 10.43. calculated for C<sub>3</sub>H<sub>4</sub>BrN<sub>3</sub>O<sub>3</sub>Pb; C: 8.63, H: 0.96, N: 10.07%. In **3**, yield: 64% (m.p > 300 °C). Found; (C, 12.22; H, 0.79; N, 14.25%. calcd. for C<sub>4</sub>H<sub>4</sub>N<sub>4</sub>O<sub>3</sub>PbS; C, 12.19; H, 0.77; N, 14.21%).

### *Synthesis of PbCl<sub>2</sub>, PbBr<sub>2</sub> and PbS nanoparticles by thermal decomposition of coordination polymers 1, 2 and 3, respectively, at oleic acid as a surfactant:*

Precursors **1-3** (0.1 mmol) were dispersed in oleic acid (1.35 ml) to form homogenous emulsion solutions. These solutions were degassed for 20 min and then heated to 200 °C for 2 h. At the end of the reaction, white precipitates for precursor **1-2** and black precipitates for precursor **3** were formed. A small amount of toluene and a large excess of MeOH were added to the all of three reaction solutions and PbCl<sub>2</sub>, PbBr<sub>2</sub> and PbS nanoparticles were separated by centrifugation for the precursors **1, 2** and **3**, respectively. The solids were washed with EtOH and dried under air atmosphere.

PbCl<sub>2</sub> with the lattice parameters (a = 7.6222(5) Å, b = 9.0448(7) Å, c = 4.5348(4) Å, S.G. = Pnam (62) and z = 4); PbBr<sub>2</sub> with the lattice parameters (a = 8.062 Å, b = 9.5393 Å, c = 4.7348 Å, S.G. = Pnam (62) and z = 4); PbS with the lattice parameters (a = 5.9362 Å, S.G. = Fm3m (225) and z = 4)

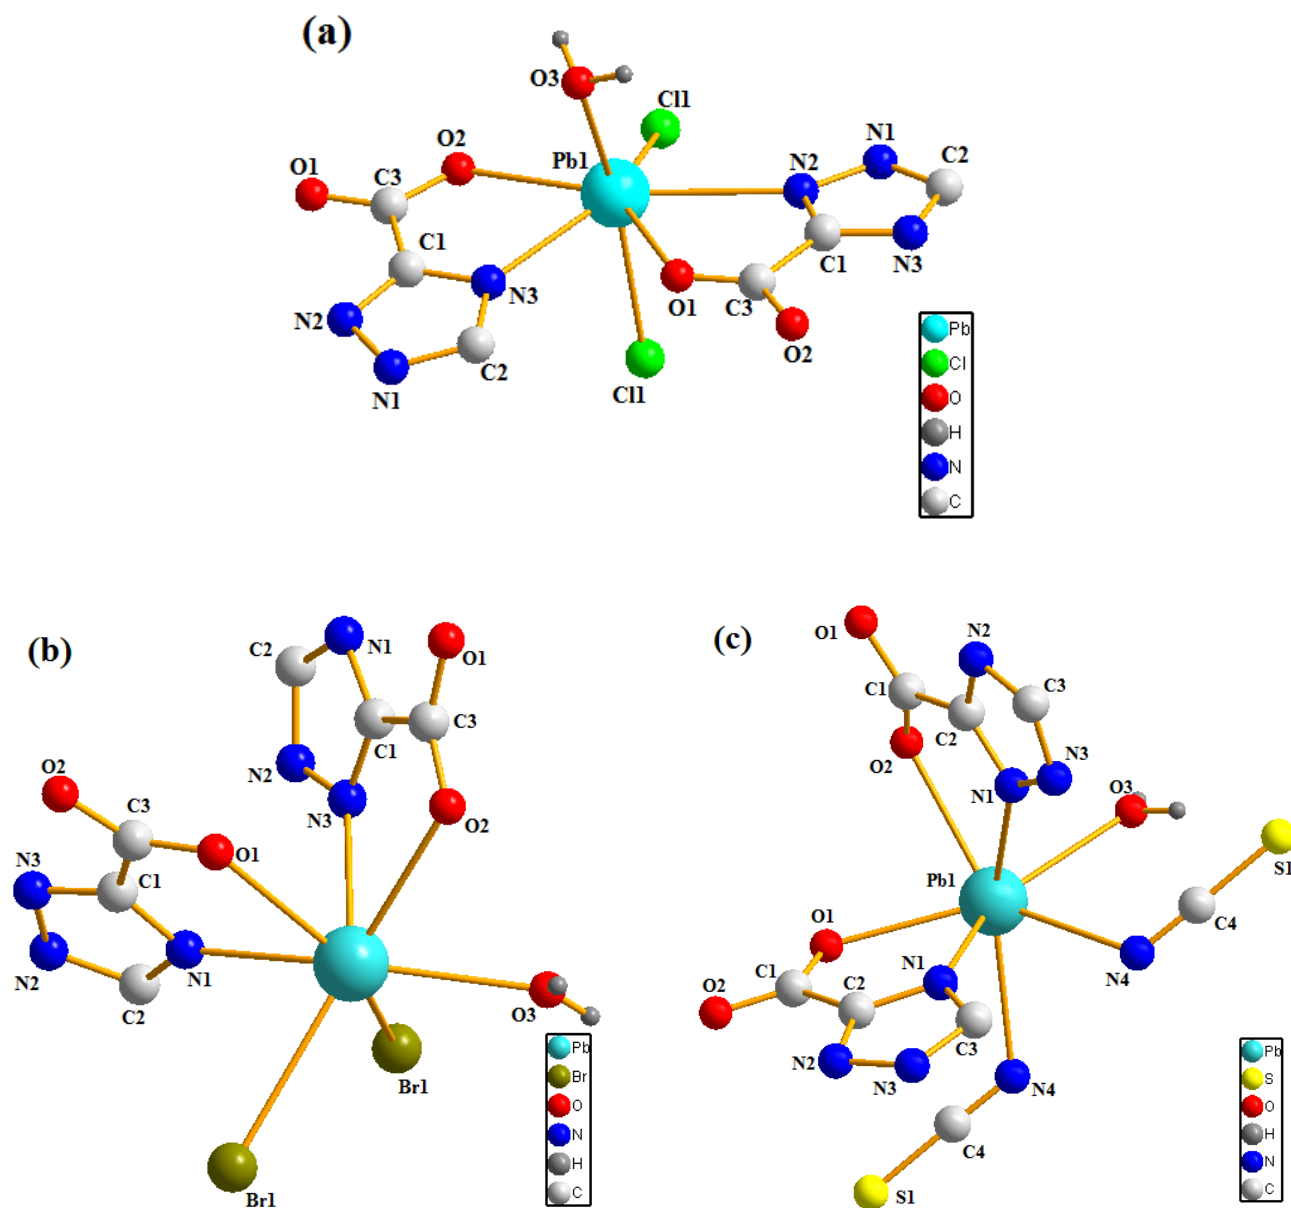

**Fig. S1** The coordination environments of the (a) compound  $[\text{Pb}(\text{L})(\mu_2\text{-Cl})(\text{H}_2\text{O})]_n$  (**1**) (b) compound  $[\text{Pb}(\text{L})(\mu_2\text{-Br})(\text{H}_2\text{O})]_n$  (**2**) and (c) compound  $[\text{Pb}(\text{L})(\mu_{1,1'}\text{-NCS})(\text{H}_2\text{O})]_n$  (**3**).

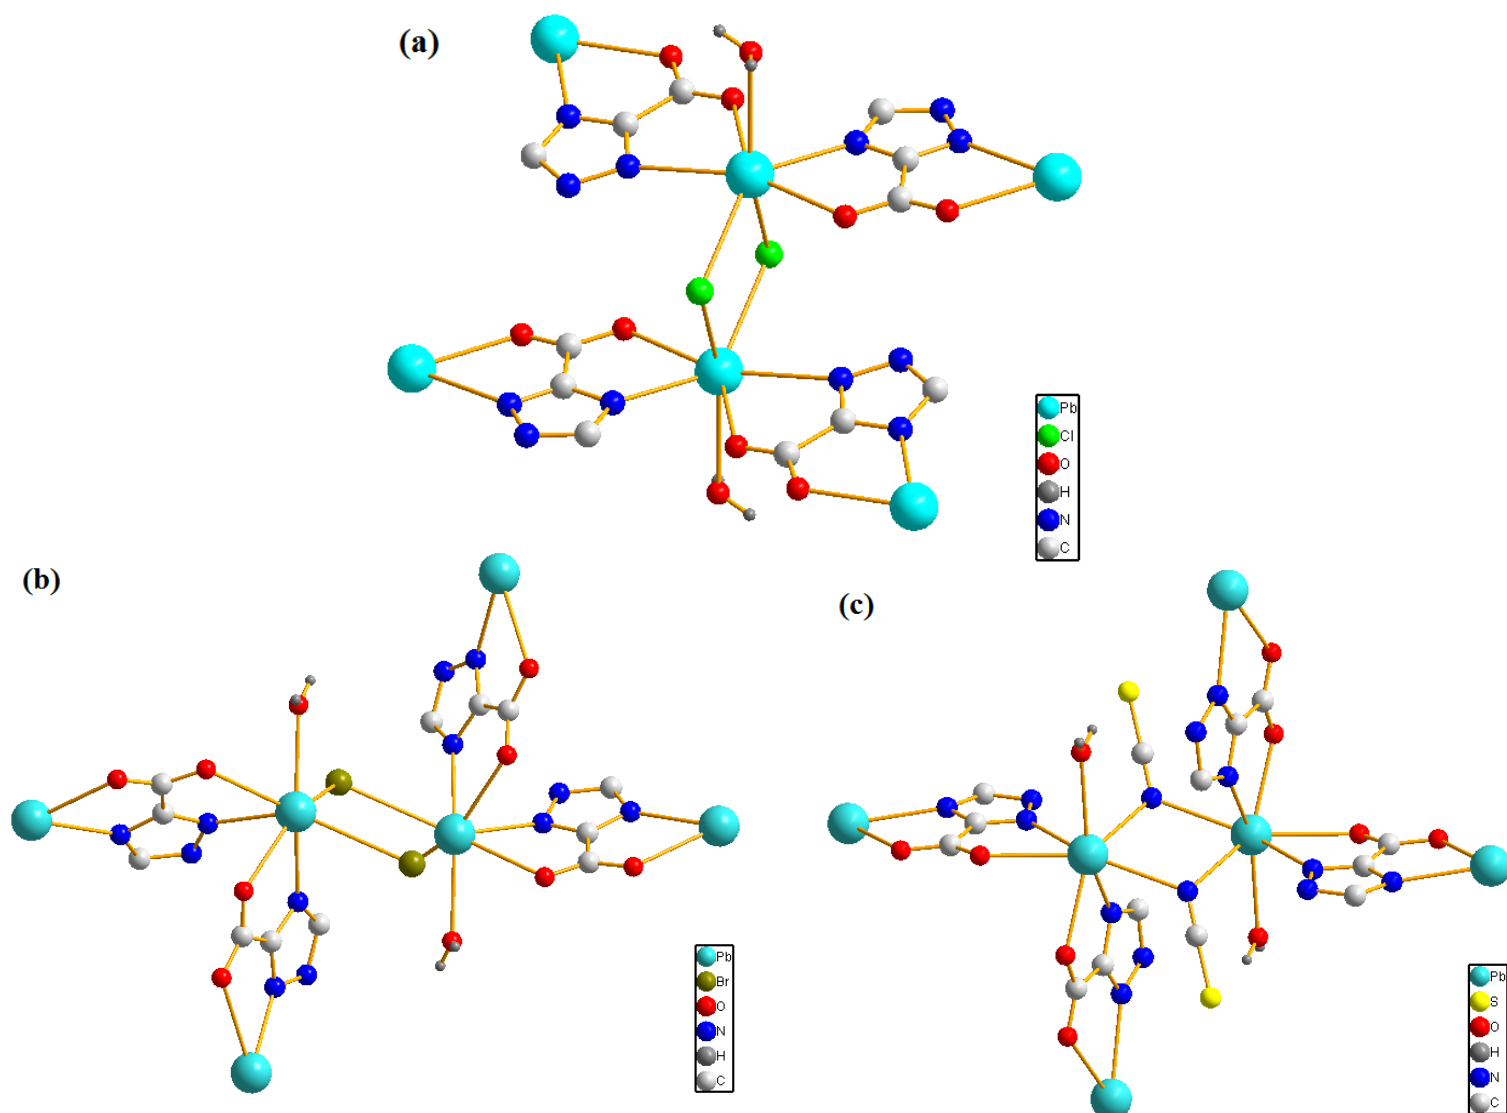

**Fig. S2** (a) View of a section of the dimeric units by bridging of the  $\text{Cl}^-$  anions via one sides in **1** (b) View of a section of the dimeric units by bridging of the  $\text{Br}^-$  anions via one sides in **2** and (c) View of a section of the dimeric units by bridging of the  $\text{NCS}^-$  anions via one sides in **3**.

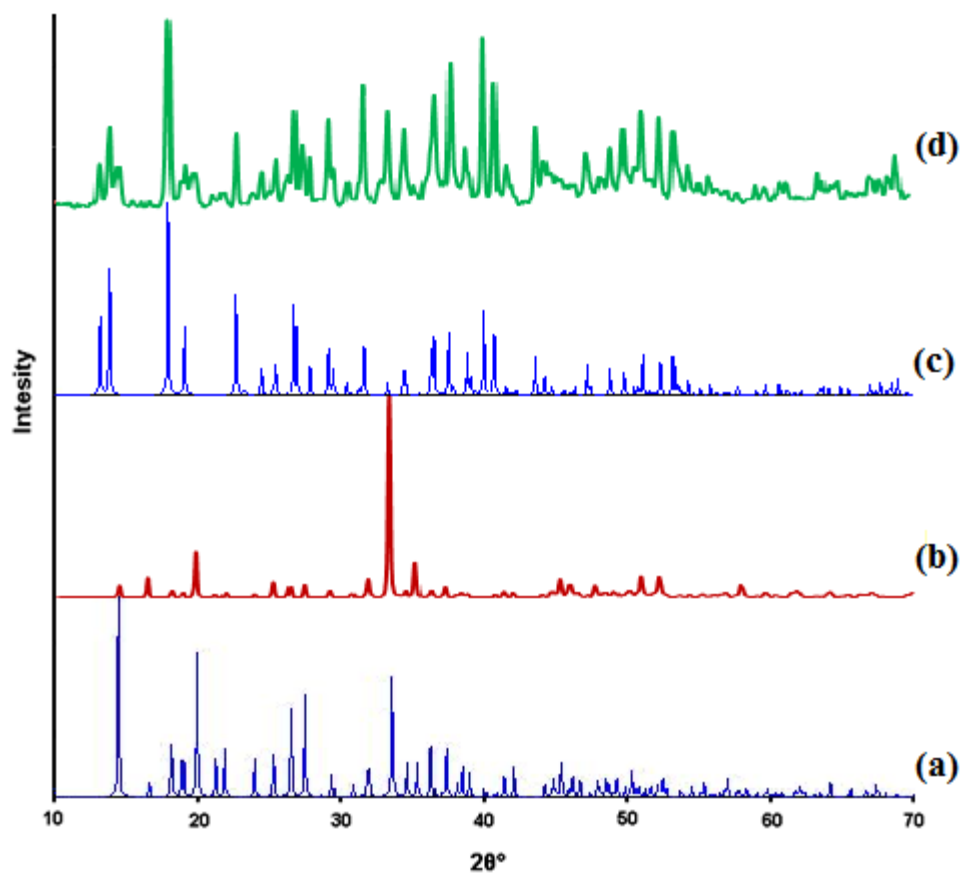

**Fig. S3** The XRD patterns of (a) simulated from single crystal X-ray data of compound **1**, (b) bulk materials as synthesized of compound **1**, (c) simulated from single crystal X-ray data of compound **2** and (d) bulk materials obtained by solid state anion-replacement of compound **1**.

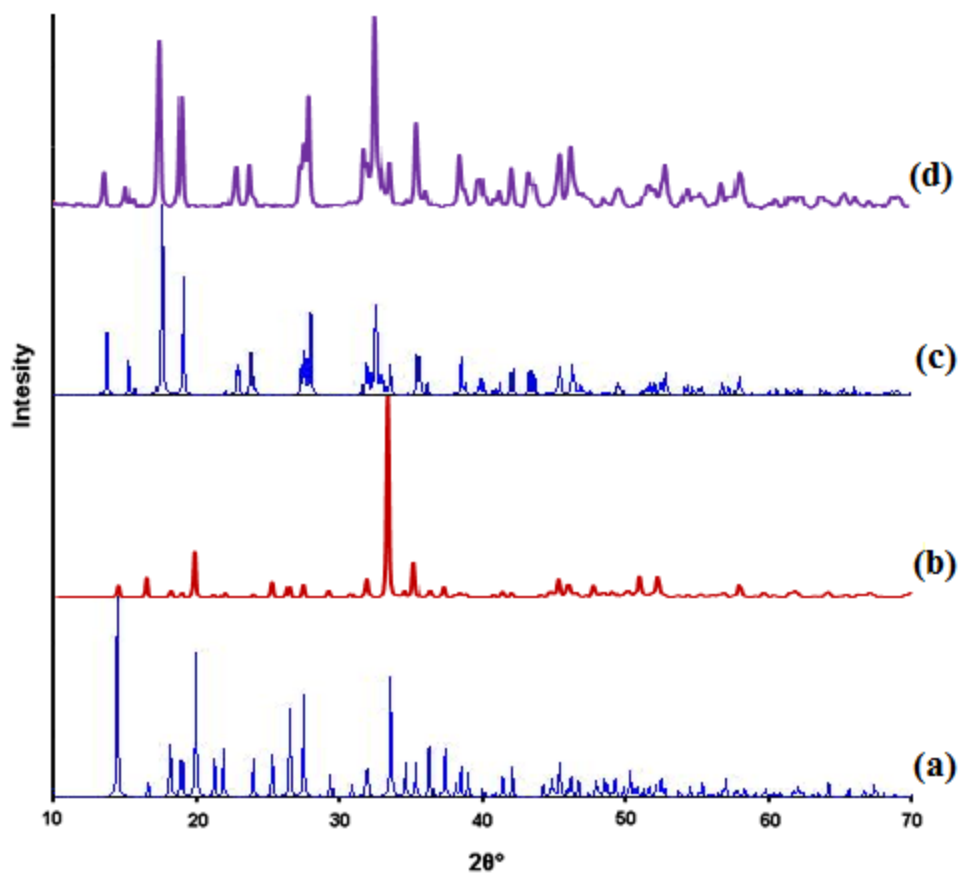

**Fig. S4** The XRD patterns of (a) simulated from single crystal X-ray data of compound **1**, (b) bulk materials as synthesized of compound **1**, (c) simulated from single crystal X-ray data of compound **3** and (d) bulk materials obtained by solid state anion-replacement of compound **1**.

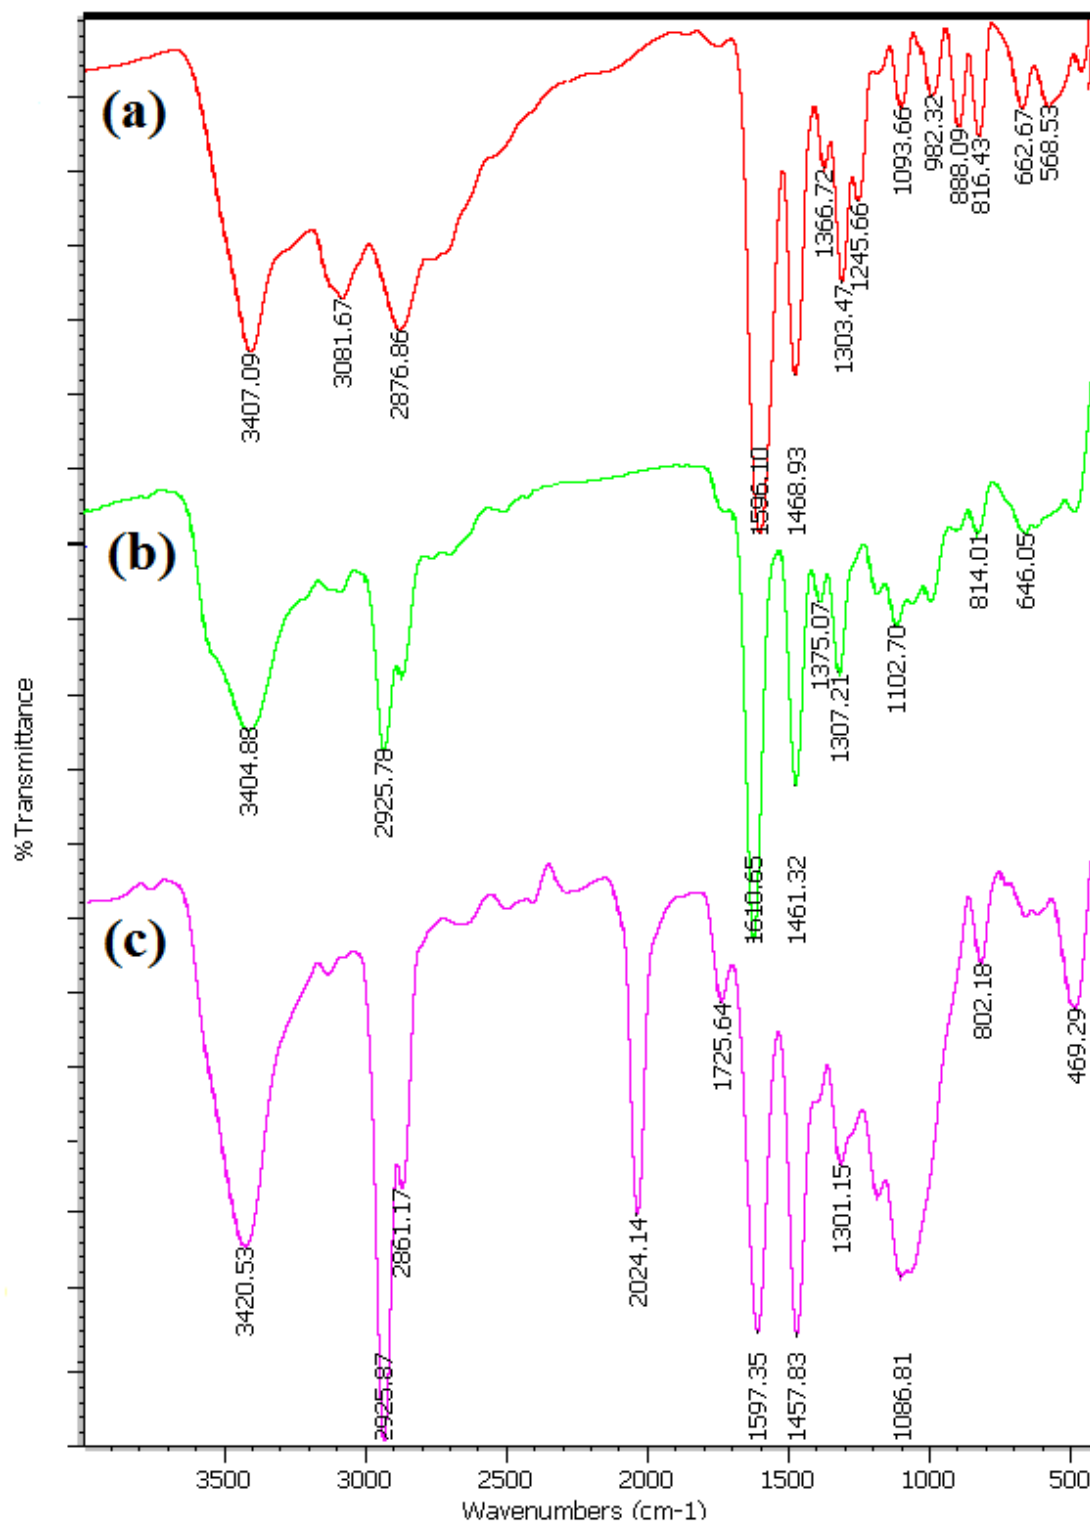

**Fig. S5** IR spectra of (a) compound **1**, (b) bulk materials obtained by solid state anion-replacement of compound **1** by grinding with KBr and (c) bulk materials obtained by solid state anion-replacement of compound **1** by grinding with KSCN.

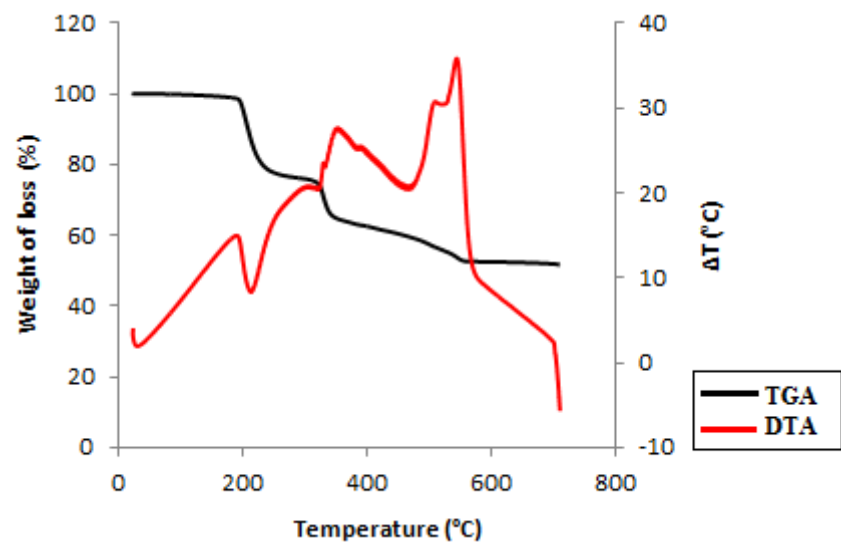

**Fig. S6** Thermal behaviour of compound 1.



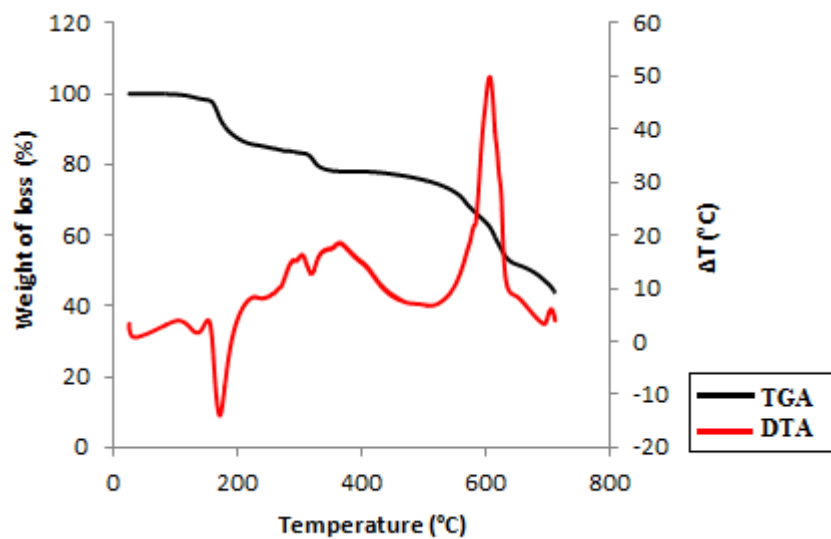

**Fig. S7** Thermal behaviour of compound 2.

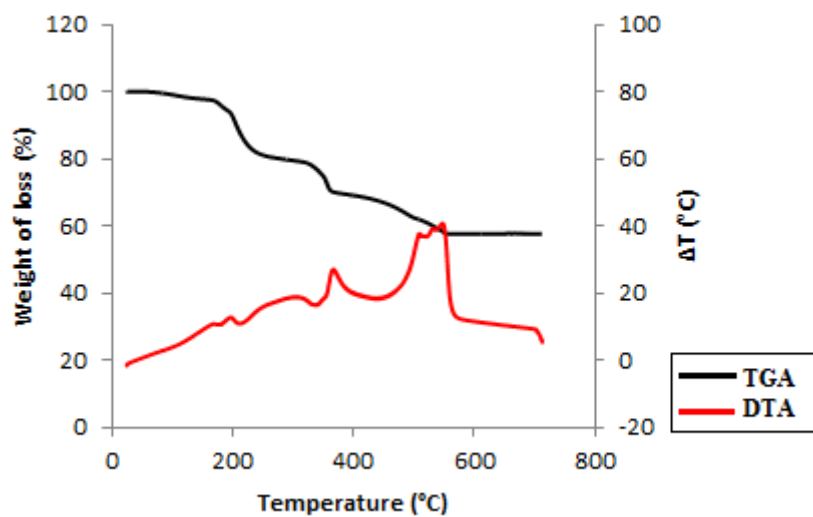

**Fig. S8** Thermal behaviour of compound **3**.

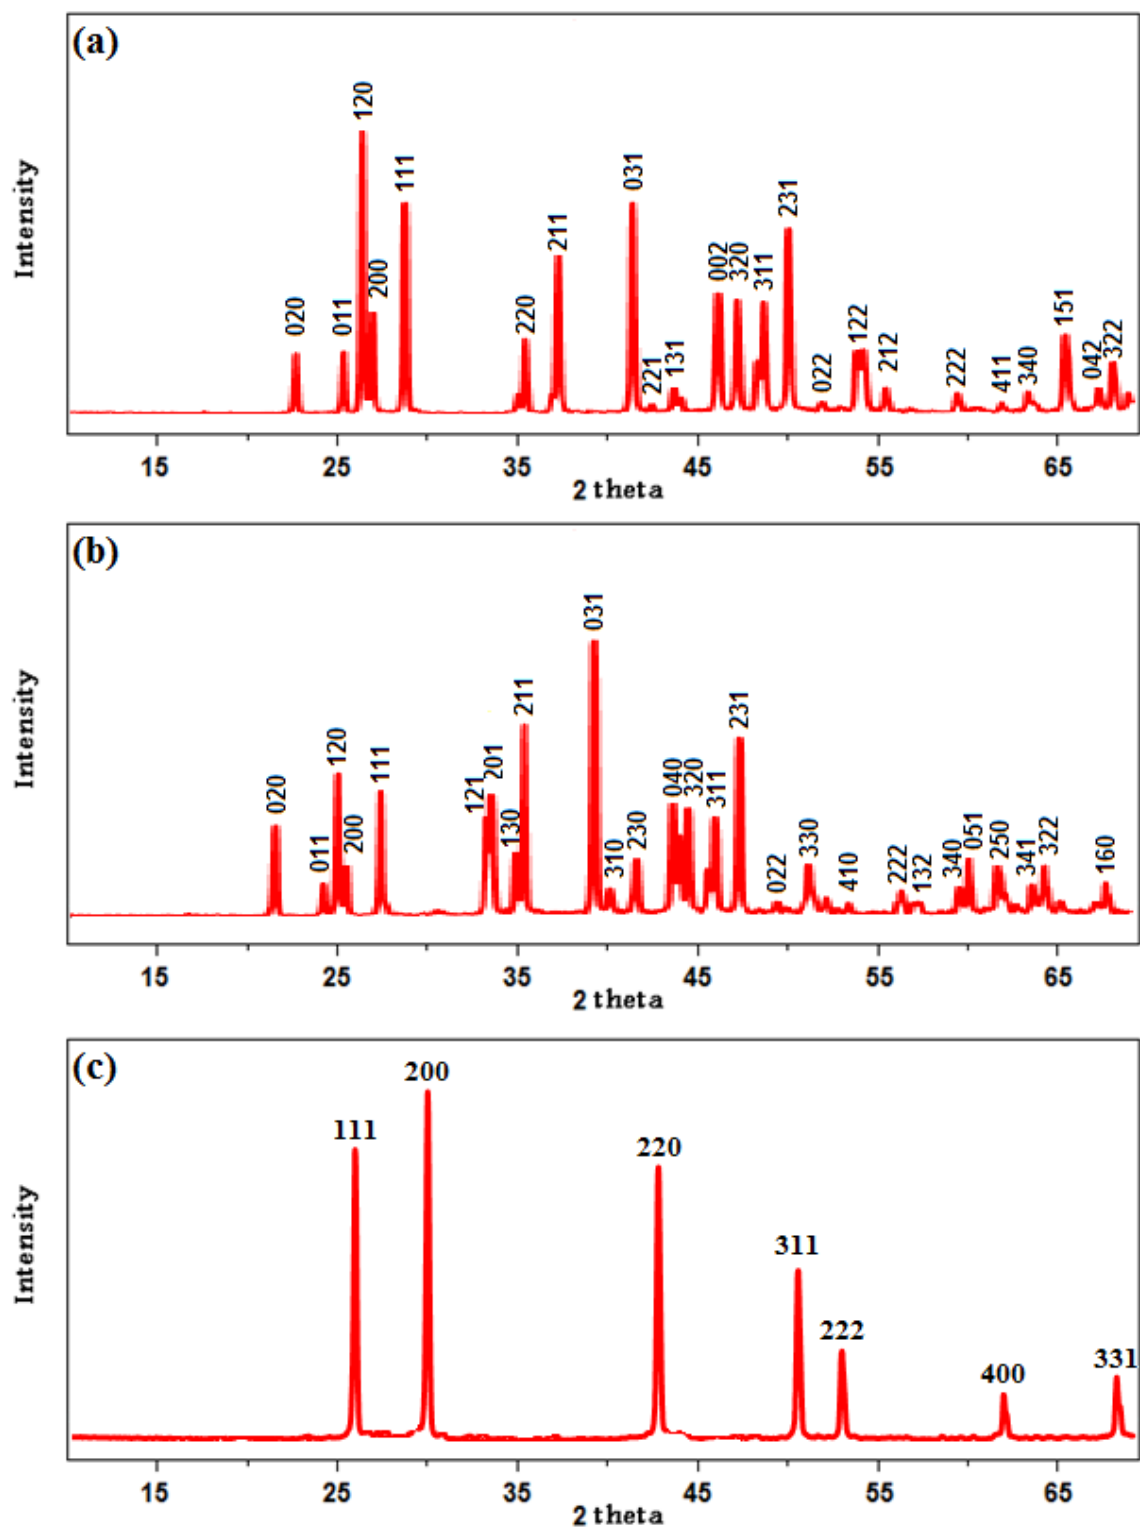

**Fig. S9** XRD patterns of (a) PbCl<sub>2</sub>, (b) PbBr<sub>2</sub> and (c) cubic-shaped PbS nanoparticles prepared by thermolysis of compounds **1**, **2** and **3** in oleic acid at 200 °C under air atmosphere for 2 h, respectively
